# Supplementary material for: Mussel-inspired chemistry and Stöber method for highly stabilized water-in-oil emulsions separation
Source: Royal Society of Chemistry journal article supplement (doi:10.1039/c4ta05075d), 2014-10-06
Supplement: c4ta05075d1.pdf [file c4ta05075d1.pdf]

Electronic Supplementary Information

**Mussel-Inspired Chemistry and Stöber Method for Highly Stabilized Water-in-Oil Emulsions Separation**

Yingze Cao, Yuning Chen, Na Liu, Xin Lin, Lin Feng\*, and Yen Wei

**Chemicals**

Dopamine hydrochloride (Sangon Biotech Co. Ltd., Shanghai, China) and 3-aminopropyltriethoxysilane and n-dodecyltrimethoxysilane (J&K Scientific Ltd. China) were used as purchased. Other reagents from Sinopharm Chemical Reagents are of analytical grade and used without further purification.

**Supplementary Data**

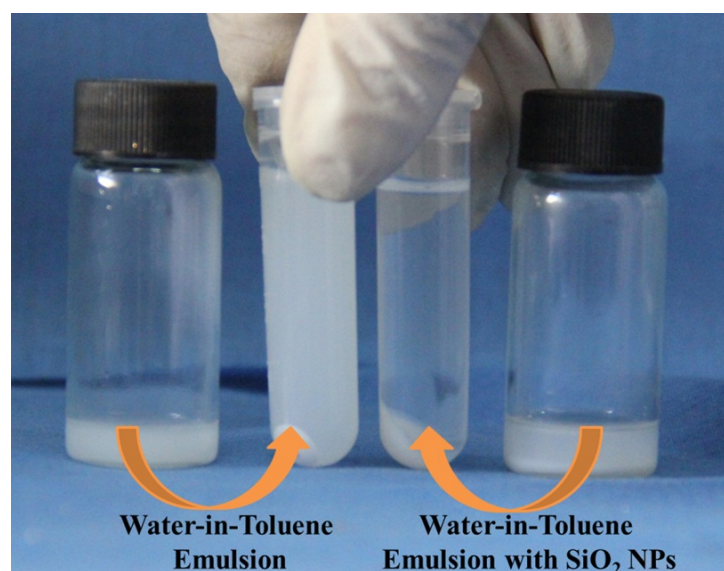

**Fig. S1.** The demulsification of the as-prepared SiO<sub>2</sub> nanoparticles: samples have been centrifuged at a moderate speed for 3 min owing to the size of the SiO<sub>2</sub> nanoparticles. It clearly presents the demulsification of the functional SiO<sub>2</sub> nanoparticles.

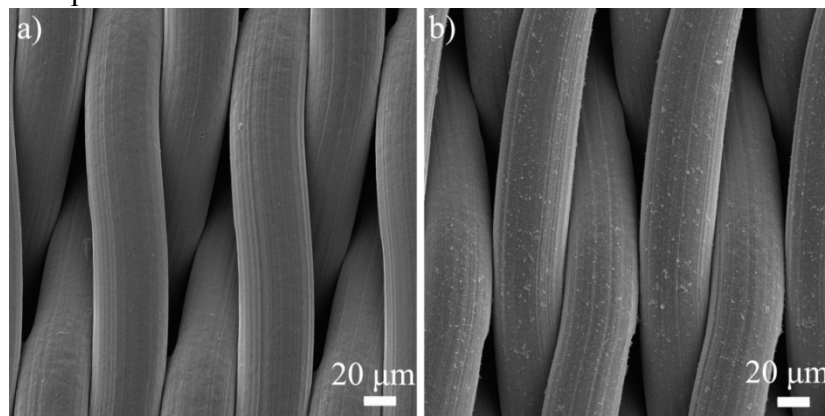

**Fig. S2.** a) SEM image of the uncoated mesh shows a smooth and clear surface and b) SEM image of polydopamine coated mesh with uniformly nano-scale particles.

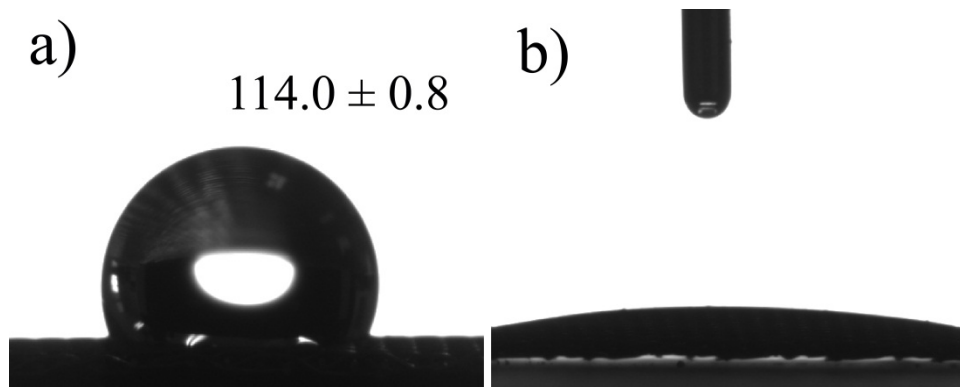

**Fig. S3.** a) the photograph of a water droplet (2  $\mu\text{L}$ ) on the stainless steel mesh with a contact angle of  $114.0 \pm 0.8^\circ$ ; b) a water droplet (2  $\mu\text{L}$ ) spread and permeate quickly on the polydopamine coated mesh.

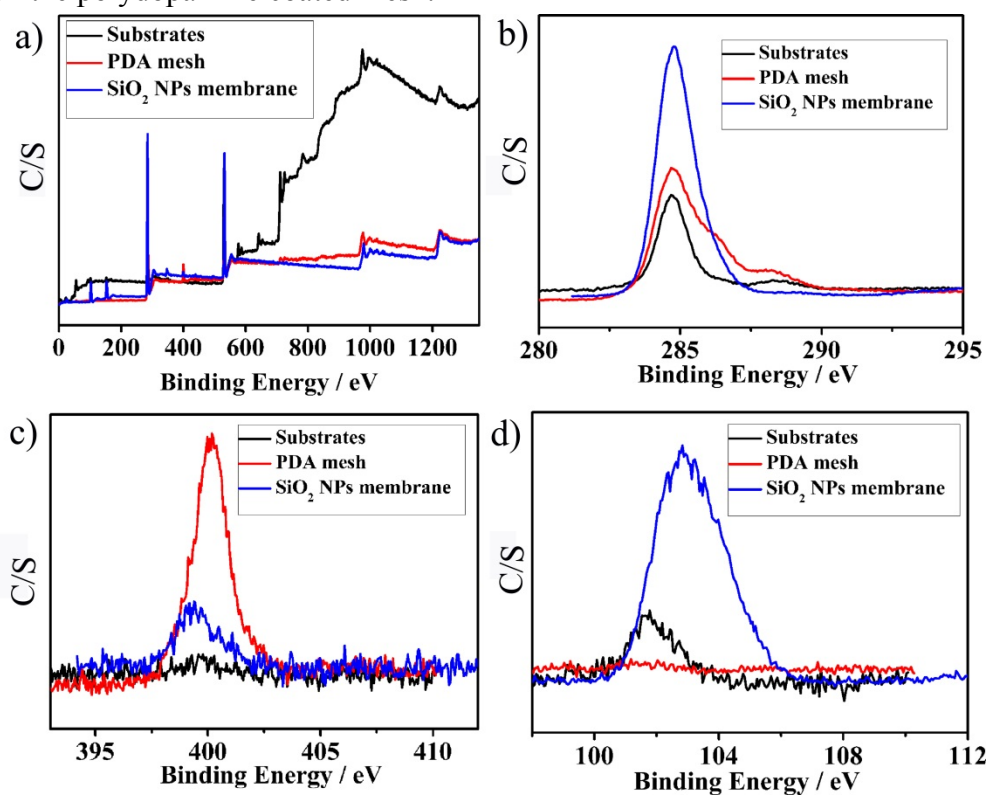

**Fig. S4.** XPS spectra of the as-prepared mesh: a) survey scans the spectral region from 0 to 1350 eV; b-d) high-resolution XPS C1s, N1s, and Si2p narrow scans as a function of electron binding energy (BE): the content of C gradually increased after each step; the increase of N content after dopamine self-polymerization and decrease after SiO<sub>2</sub> nanoparticles modification; silicon element was markedly increased on the SiO<sub>2</sub> nanoparticles coated membrane.

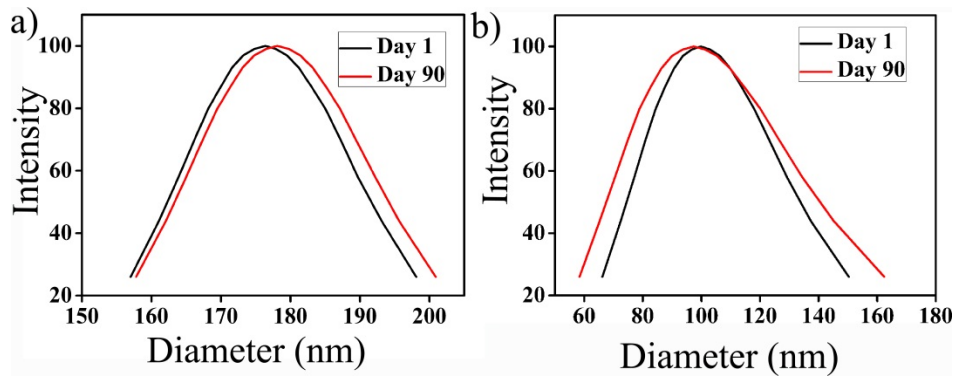

**Fig. S5.** Dynamic light scattering (DLS) graphs of water-in-chloroform and water-in-gasoline emulsions on day 1 and 90 as examples with the droplets sizes less than 200 nm.

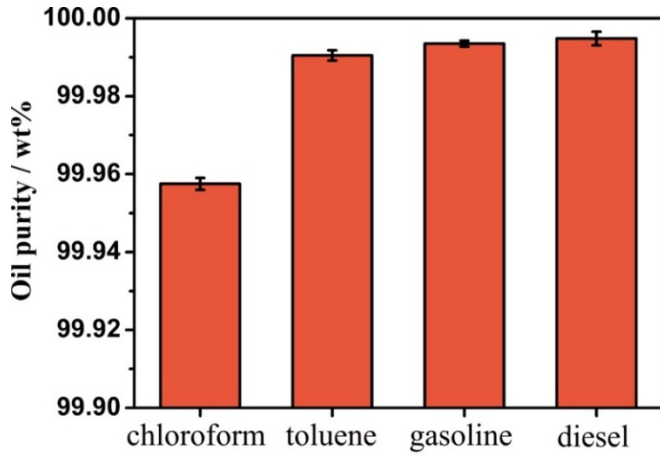

**Fig. S6.** The oil purity of the original oils that used in the experiments.

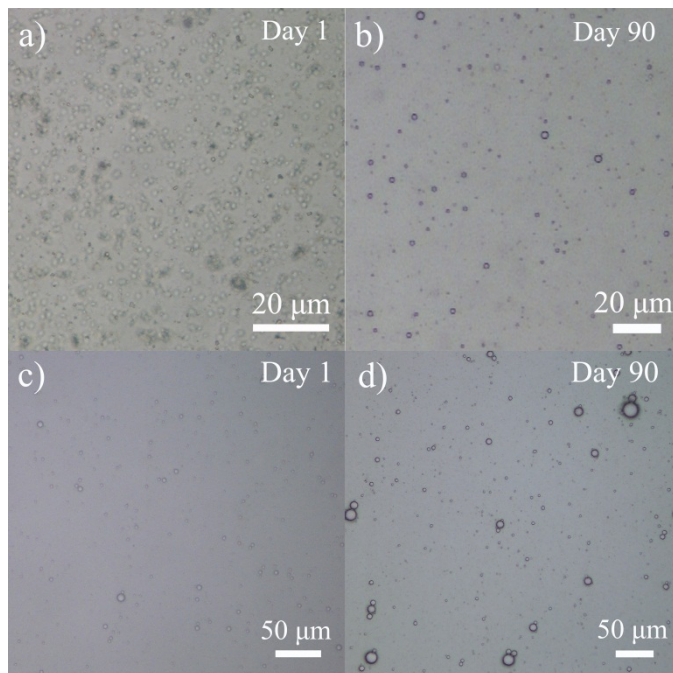

**Fig. S7.** Optical microscope images of water-in-toluene (above) and water-in-diesel (below) emulsions on 1<sup>st</sup> and 90<sup>th</sup> day, respectively.

### ***Separation Efficiency***

The separation efficiency of four emulsions is about 97%, which was calculated by the oil rejection coefficient (R (%)) according to:

$$R(\%) = \left(1 - \frac{C_p}{C_0}\right) \times 100$$

where  $C_0$  and  $C_p$  are the water concentration of the original emulsions and the collected oil after the first separation. (Fig. S8)

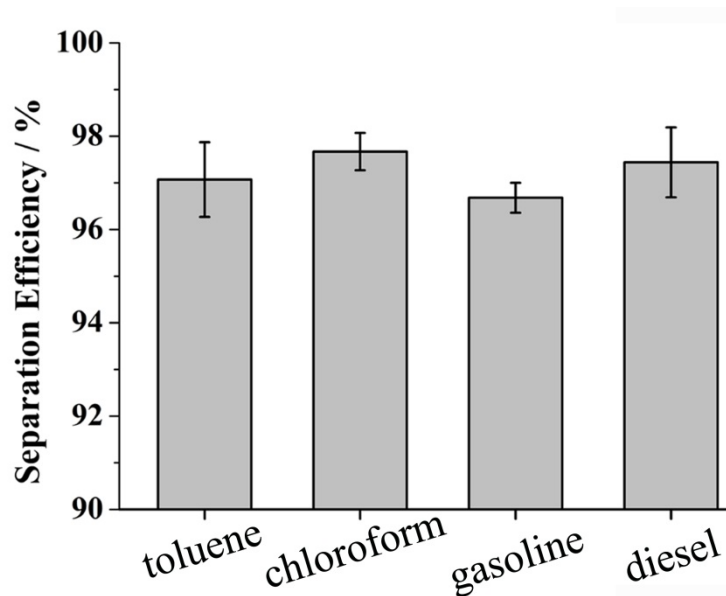

**Fig. S8.** The separation efficiency of the as-prepared membrane for a selection of water-in-oil emulsions.
